# Supplementary material
Source: ML conference proceedings conference paper supplement (https://openaccess.thecvf.com/content/cvpr_2015/html/Jung_One-Day_Outdoor_Photometric_2015_CVPR_paper.html)

# One-day outdoor photometric stereo via skylight estimation

Jiyoung Jung, Joon-Young Lee, In So Kweon  
Robotics and Computer Vision Lab, KAIST

CVPR 2015

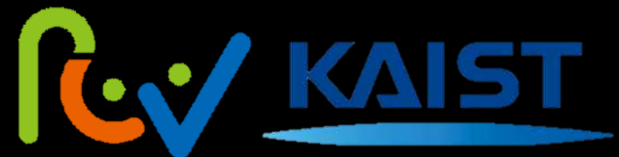

This supplementary material shows that our method is more robust to the rank condition of the light direction matrix of a day

(Surface normals are plotted in the same color map)

# Surface normal and albedo estimation using images of different days

## Arizona dataset

Latitude = 32.229918583

Longitude = -110.955159216

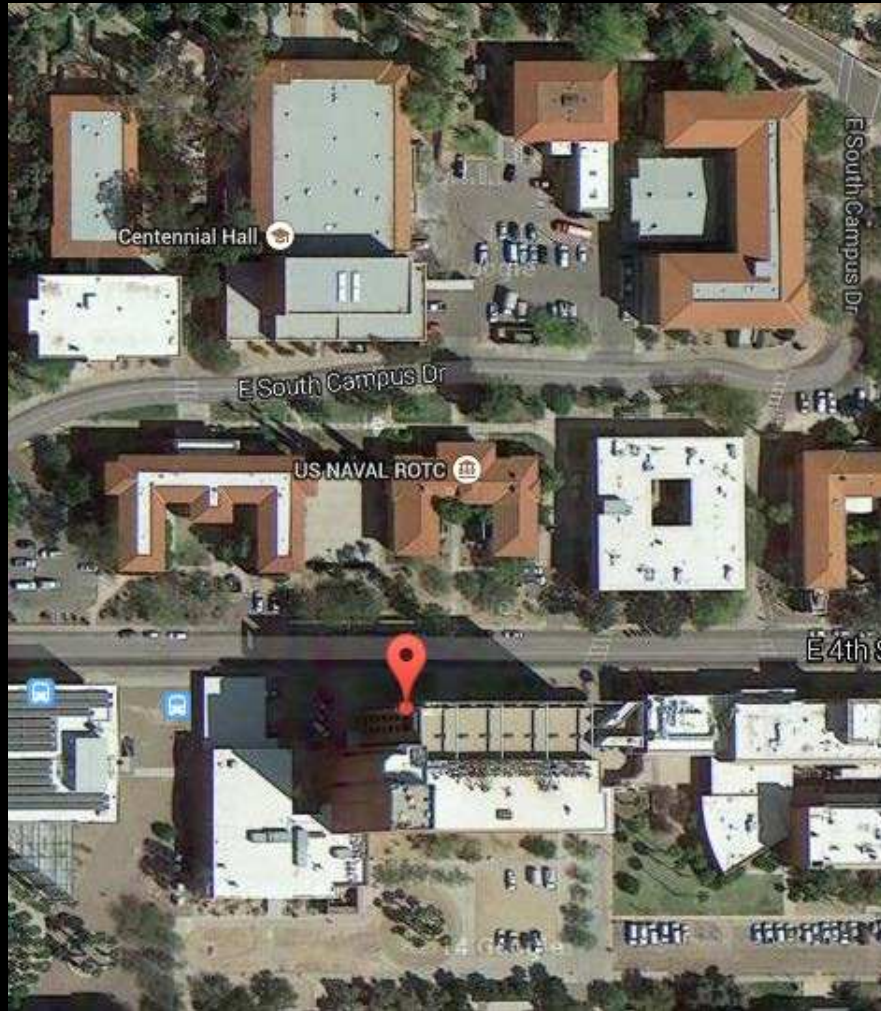

Satellite image from Google map

Inverse condition number (ratio of minimum to maximum eigenvalues) of the light direction matrix per day

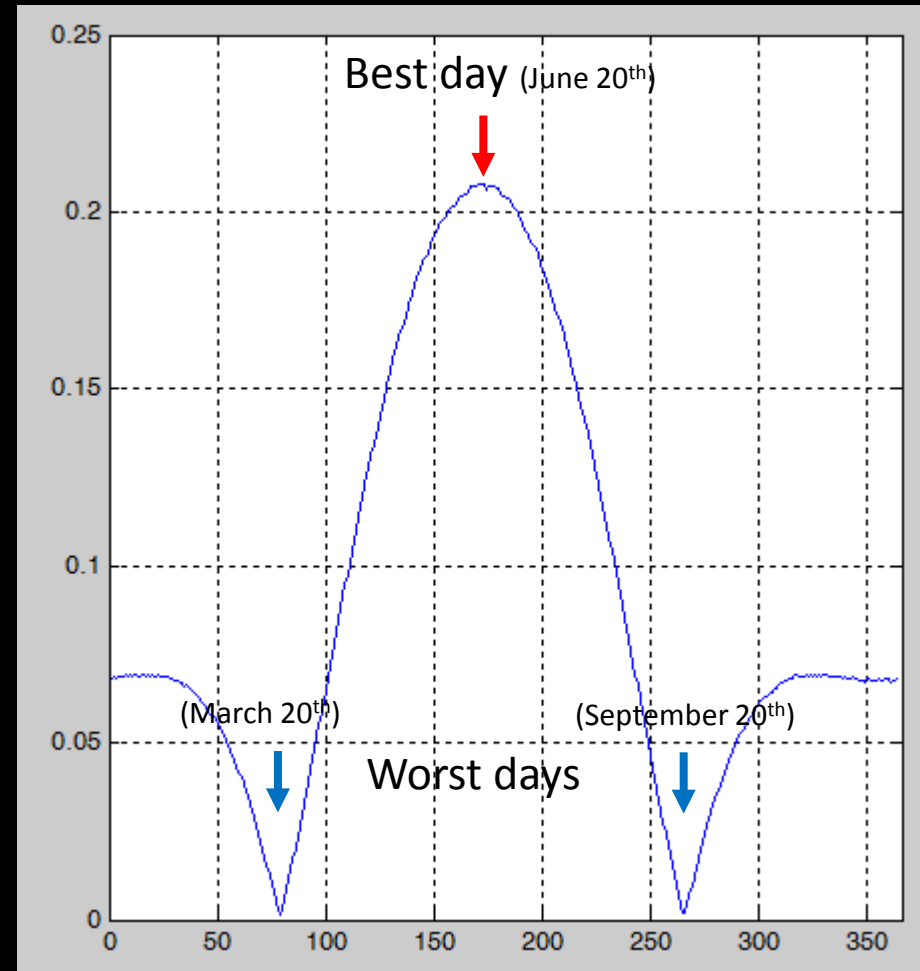



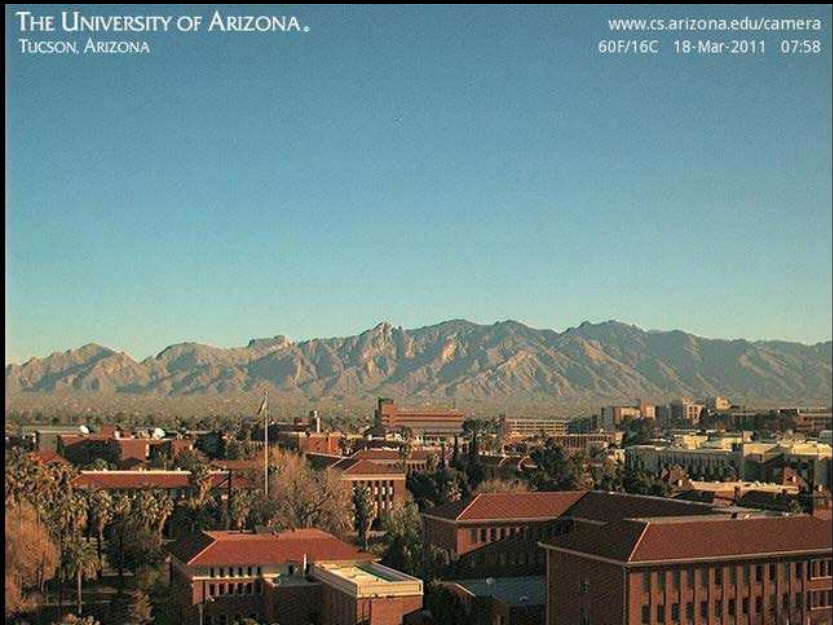

Proposed

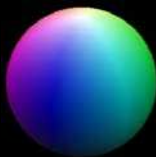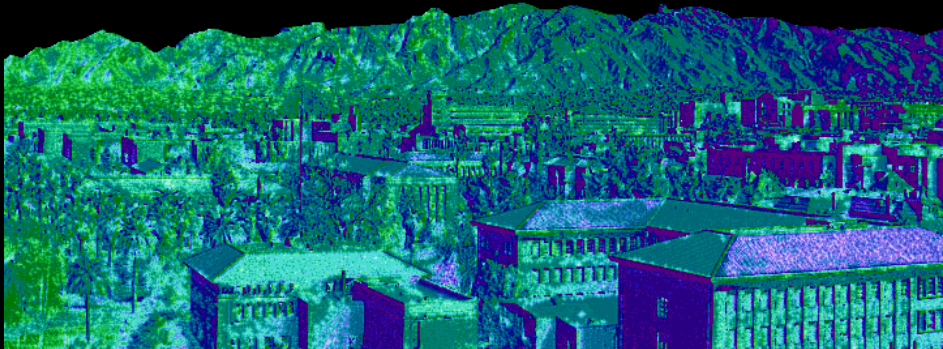

[1] Abrams et al. (ECCV 2012)

[2] Abrams et al. (CVPR 2013)

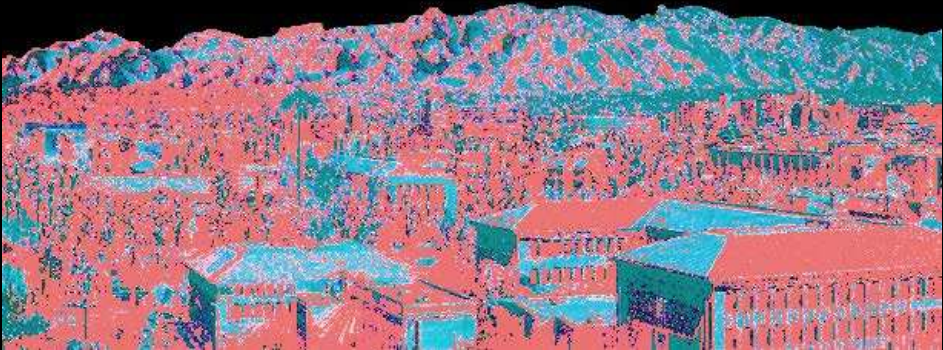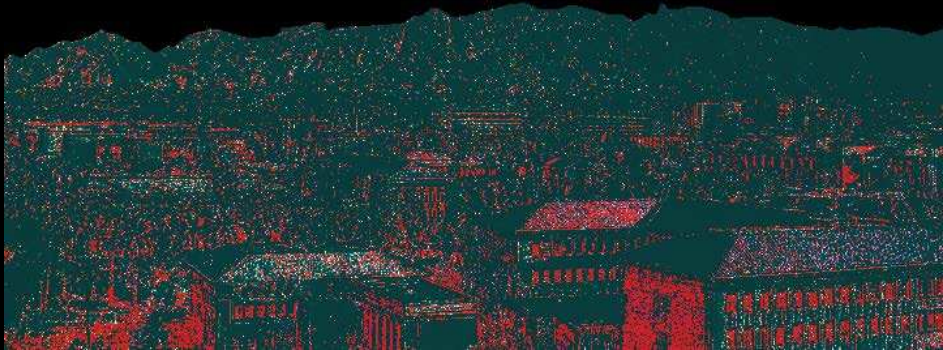



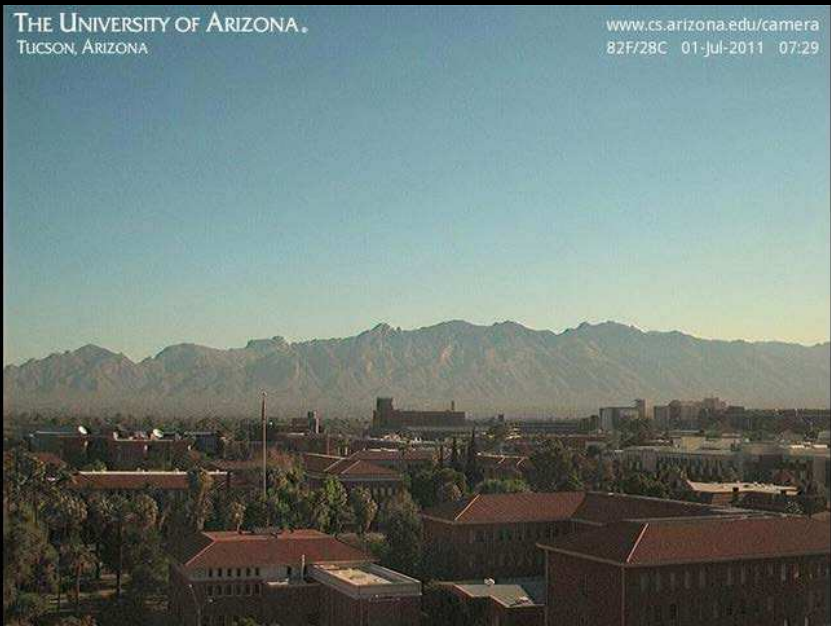

Proposed

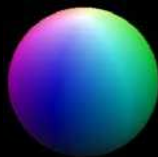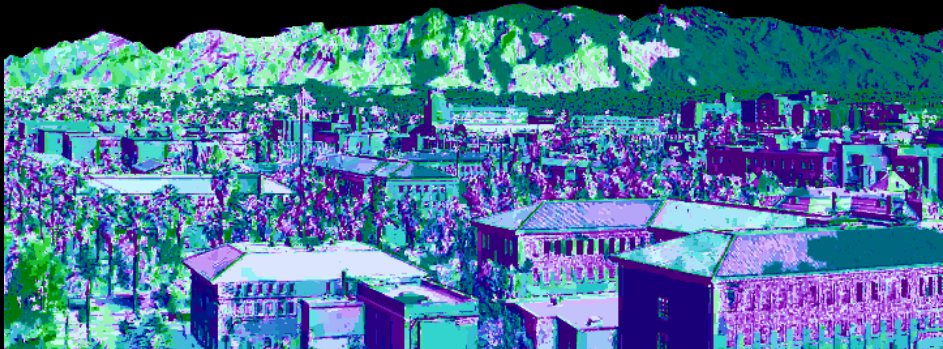

[1] Abrams et al. (ECCV 2012)

[2] Abrams et al. (CVPR 2013)

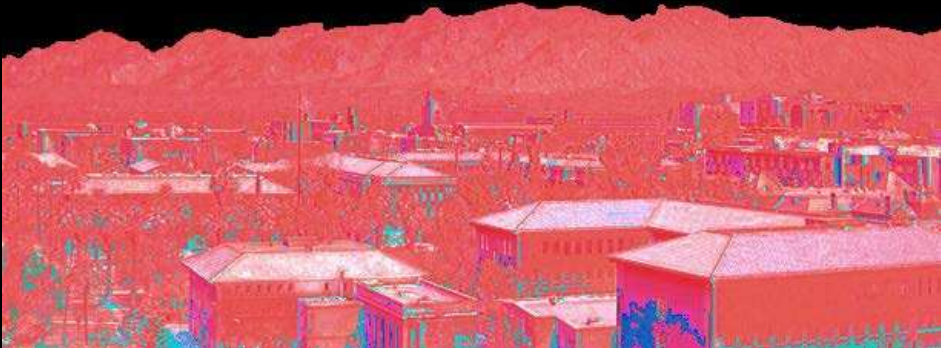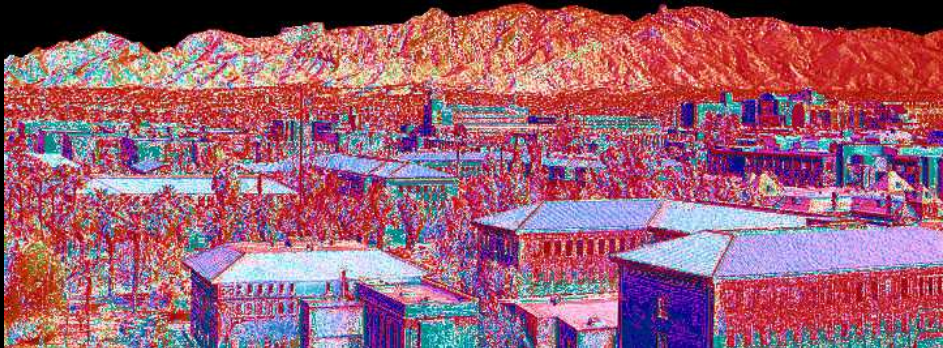



42 images of both days (Inverse condition number = 0.292)

Surface normal estimation

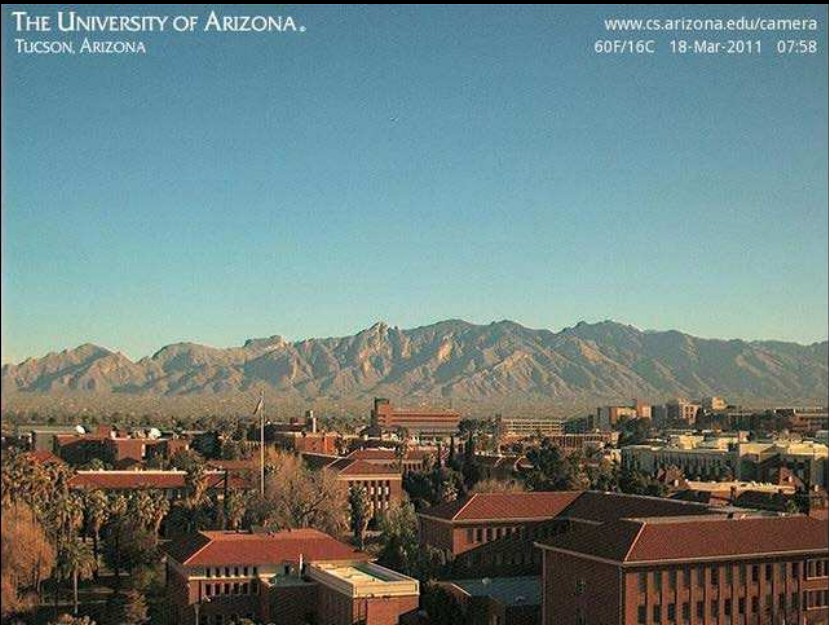

Proposed

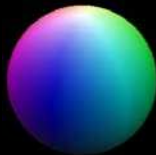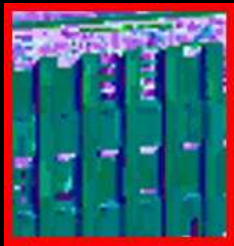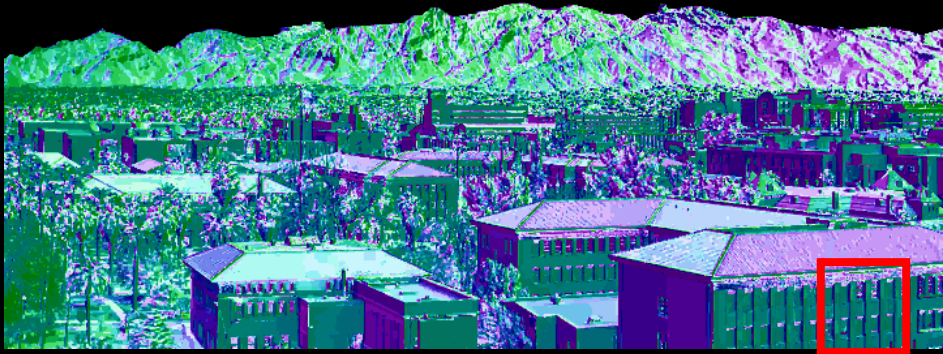

[1] Abrams et al. (ECCV 2012)

[2] Abrams et al. (CVPR 2013)

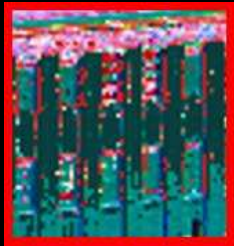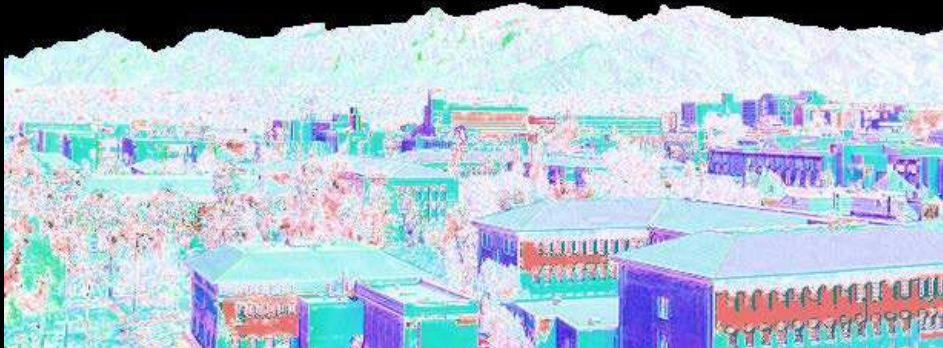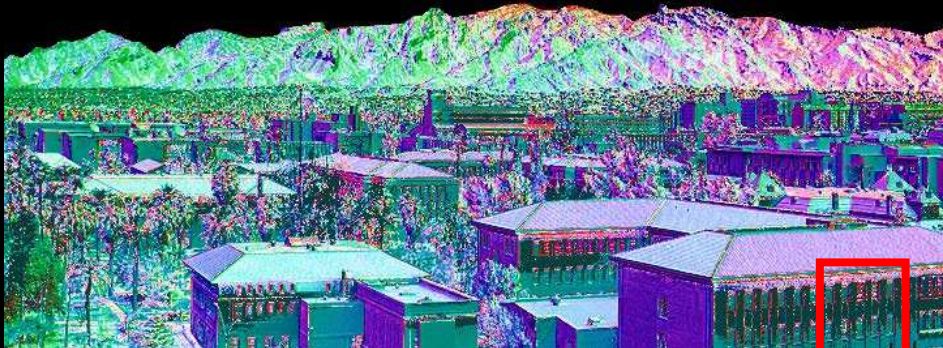



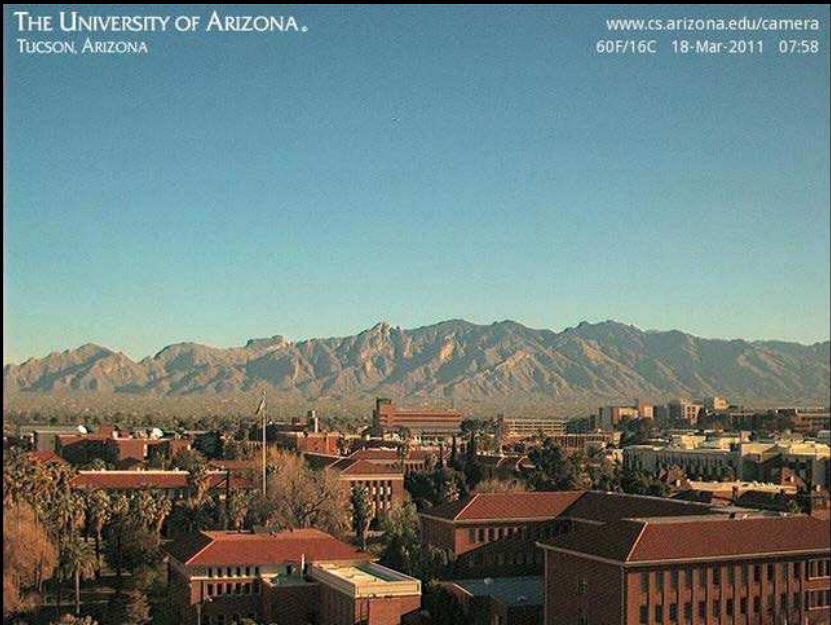

Proposed

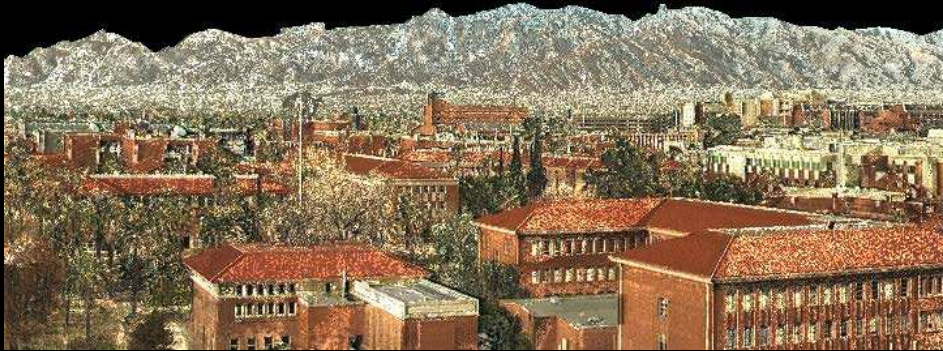

[1] Abrams et al. (ECCV 2012)

[2] Abrams et al. (CVPR 2013)

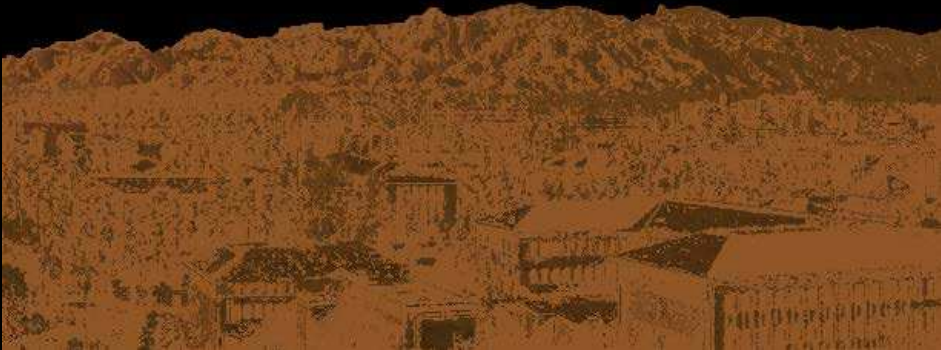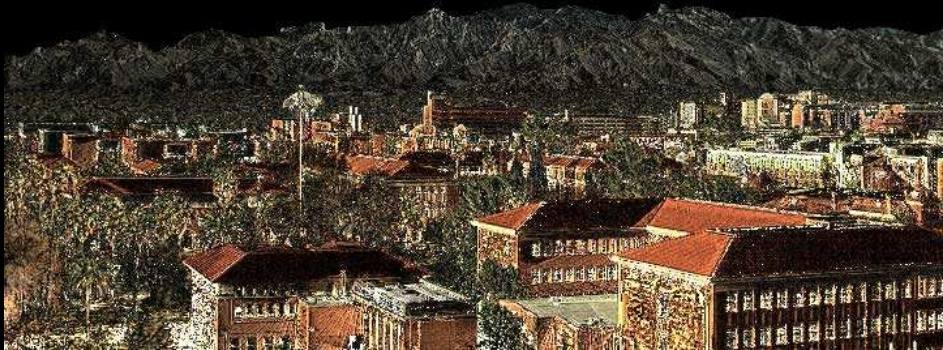



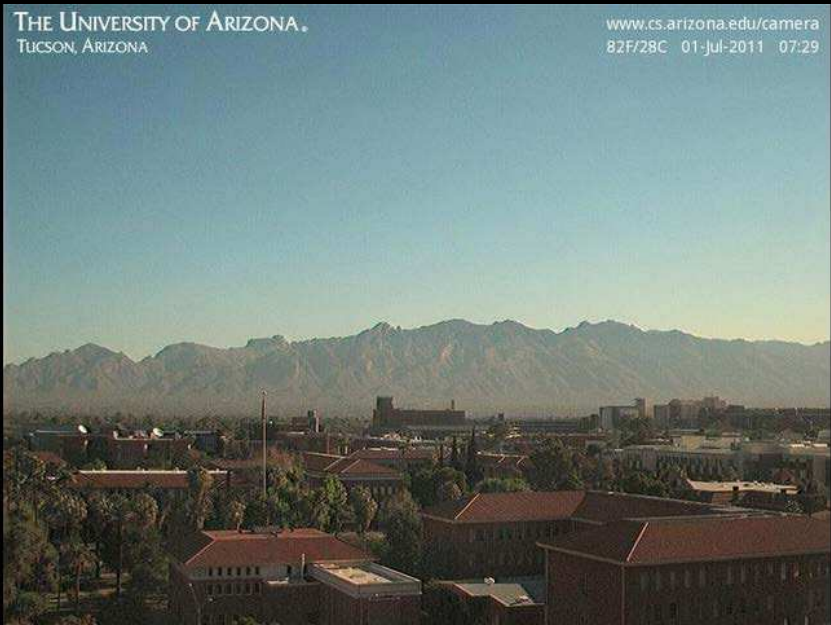

Proposed

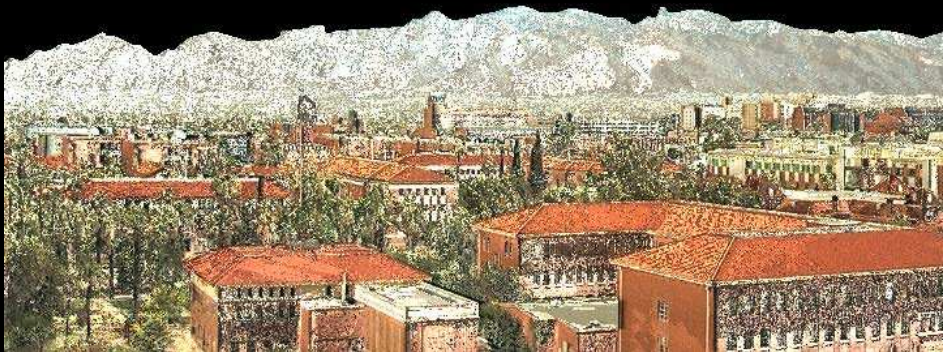

[1] Abrams et al. (ECCV 2012)

[2] Abrams et al. (CVPR 2013)

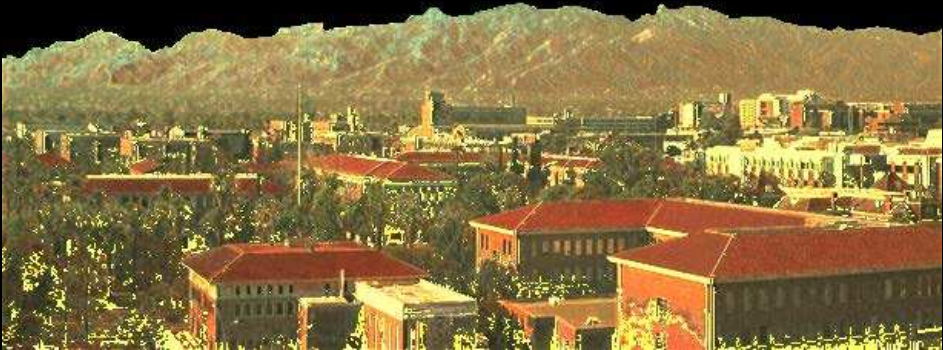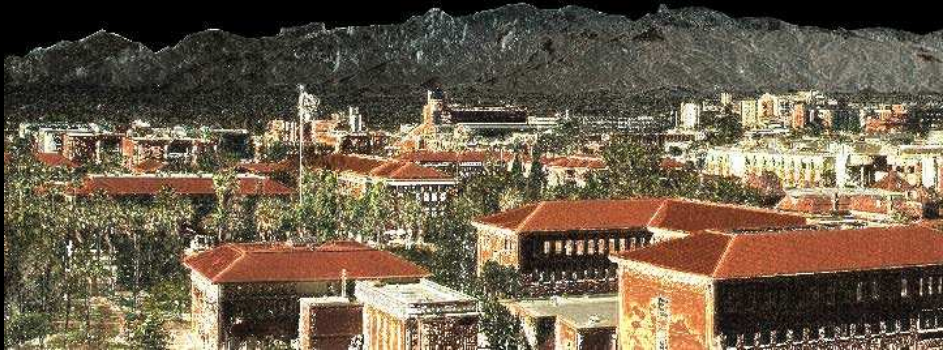



42 images of both days (Inverse condition number = 0.292)

Albedo estimation

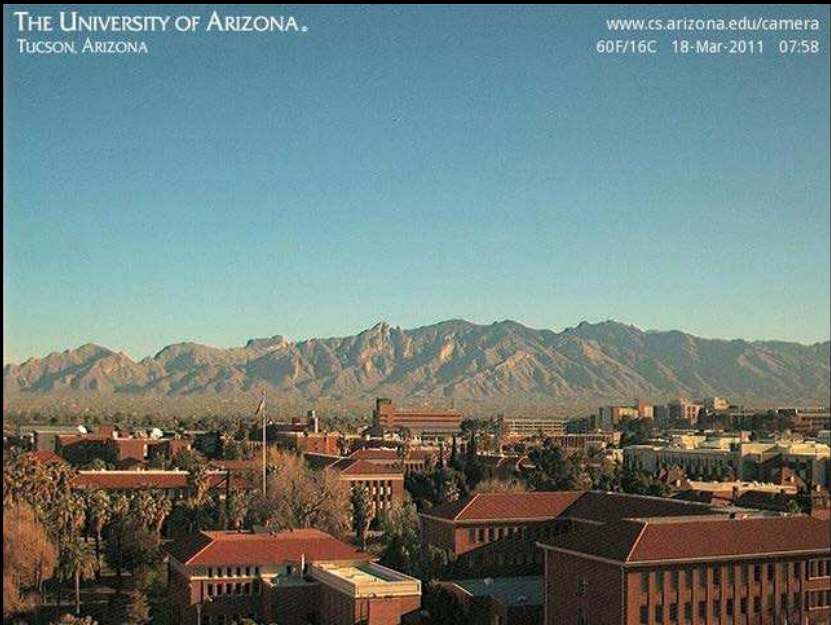

Proposed

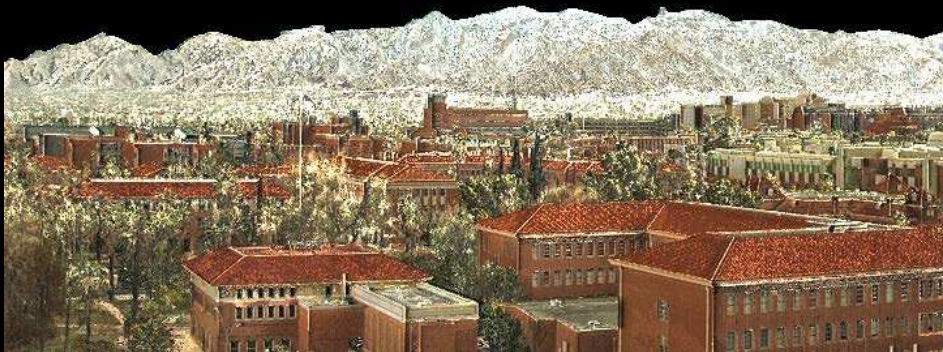

[1] Abrams et al. (ECCV 2012)

[2] Abrams et al. (CVPR 2013)

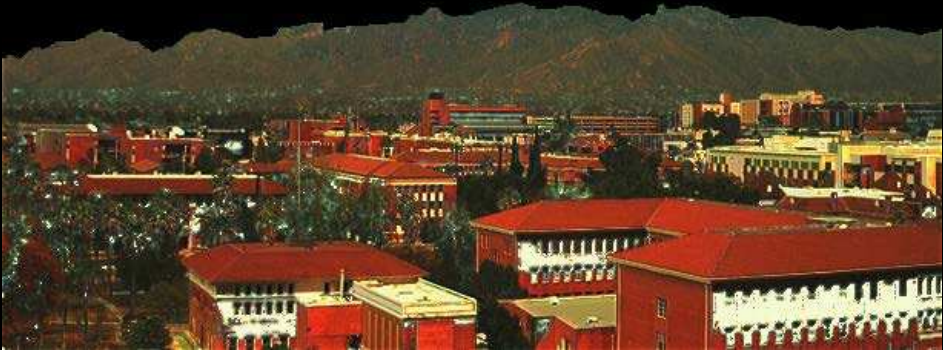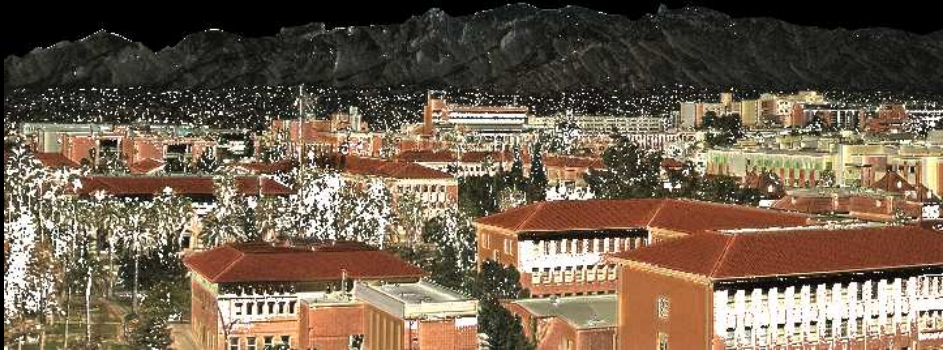

## Düsseldorf dataset

Latitude = 51.1982158268

Longitude = 6.69254670304

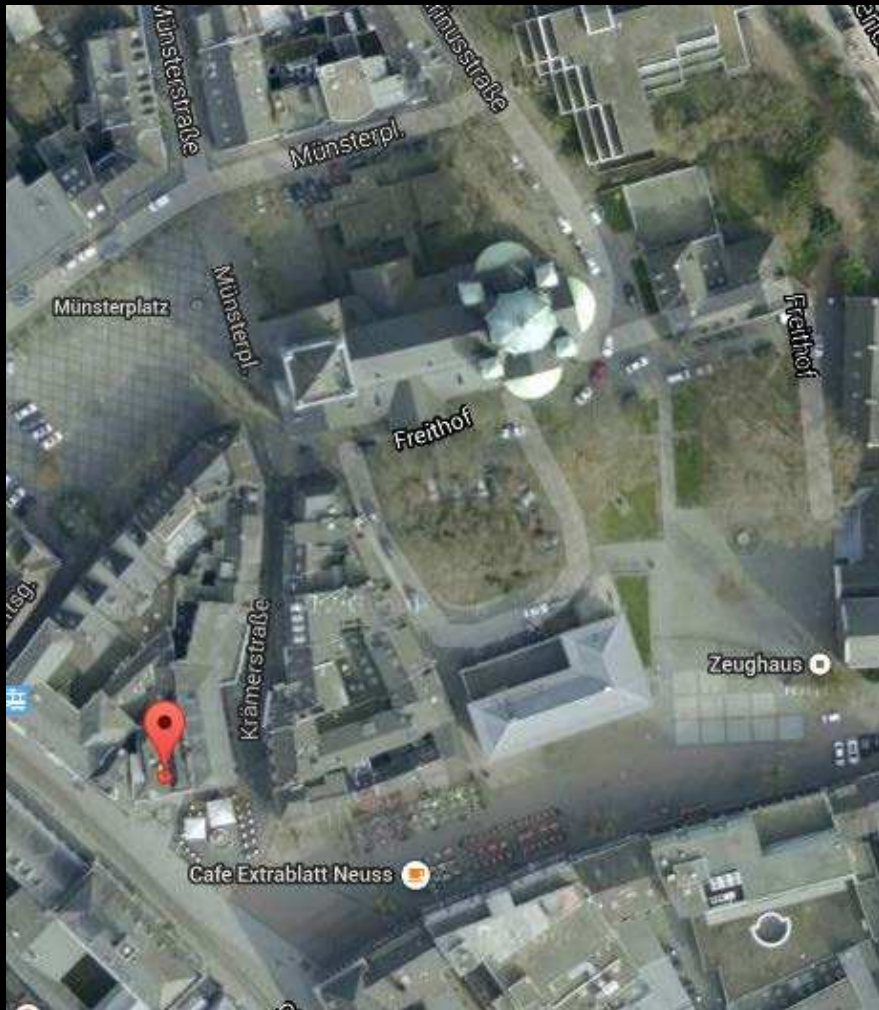

Satellite image from Google map

Inverse condition number (ratio of minimum to maximum eigenvalues) of the light direction matrix per day

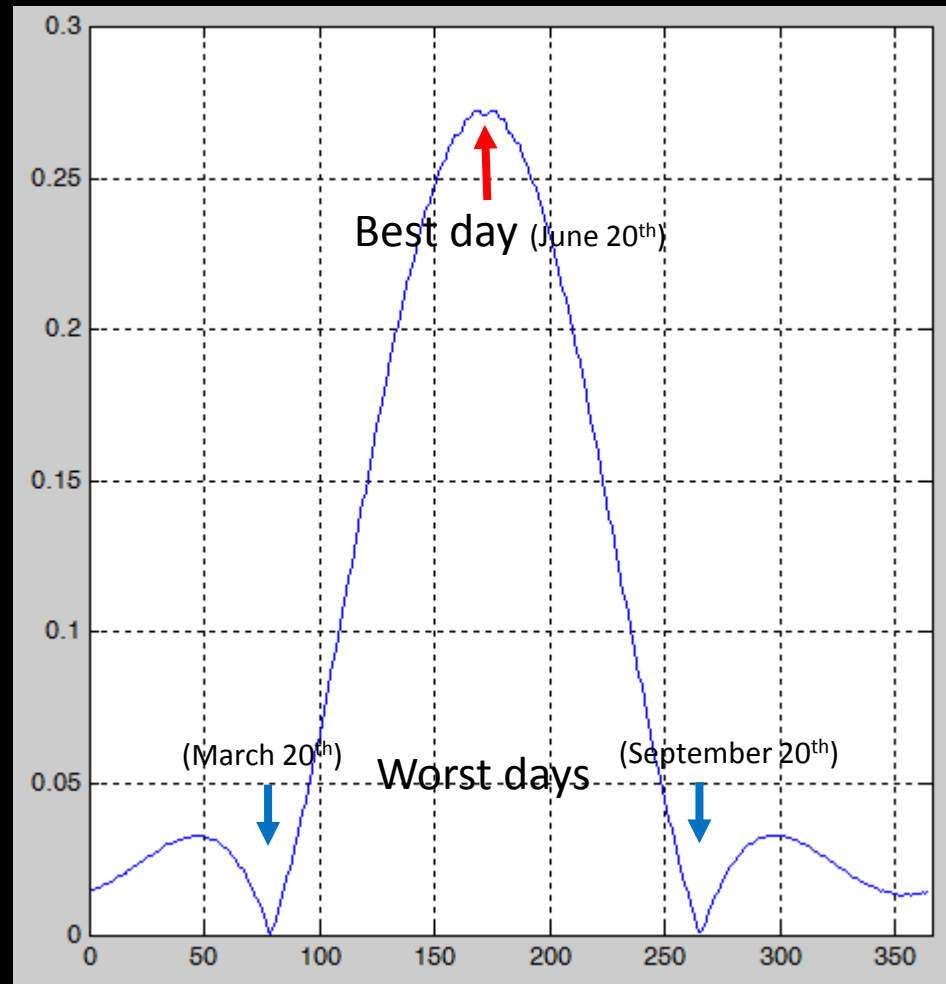



# 20 images of September 28<sup>th</sup> 2011 (Inverse condition number = 0.013) Surface normal estimation

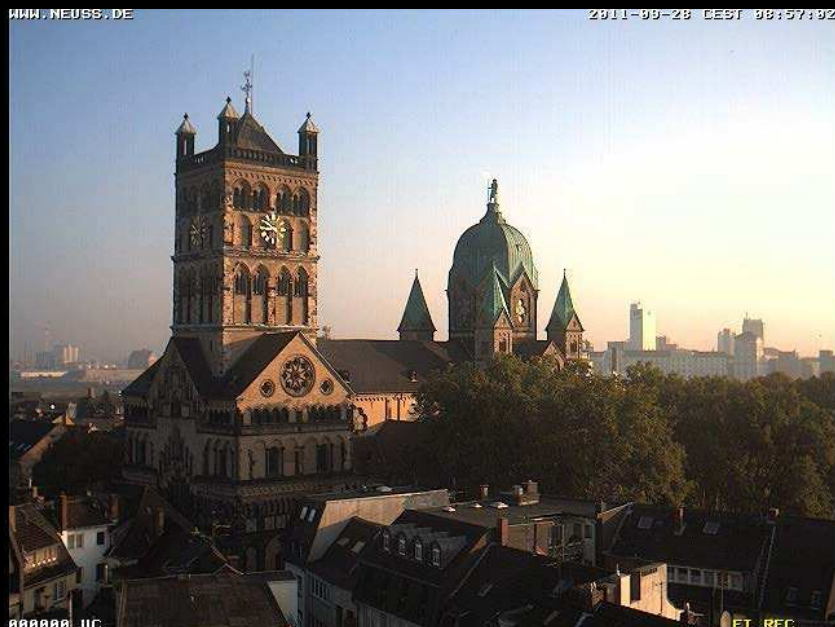

Proposed

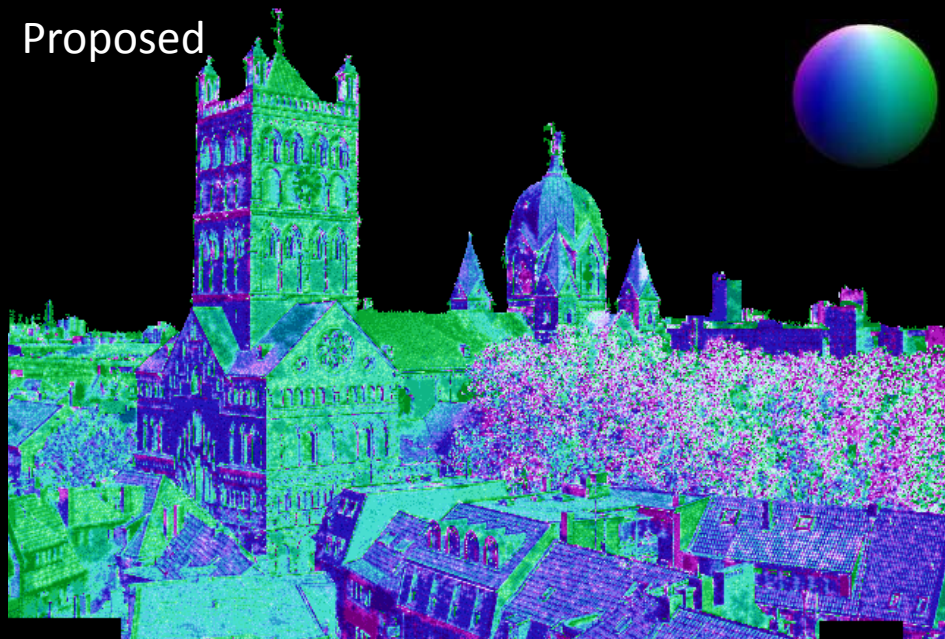

[1] Abrams et al. (ECCV 2012)

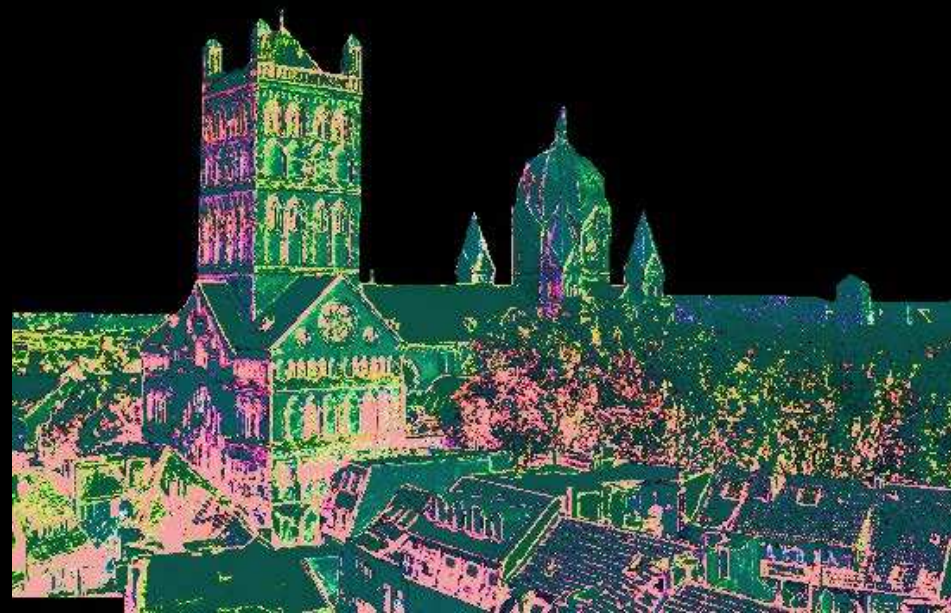

[2] Abrams et al. (CVPR 2013)

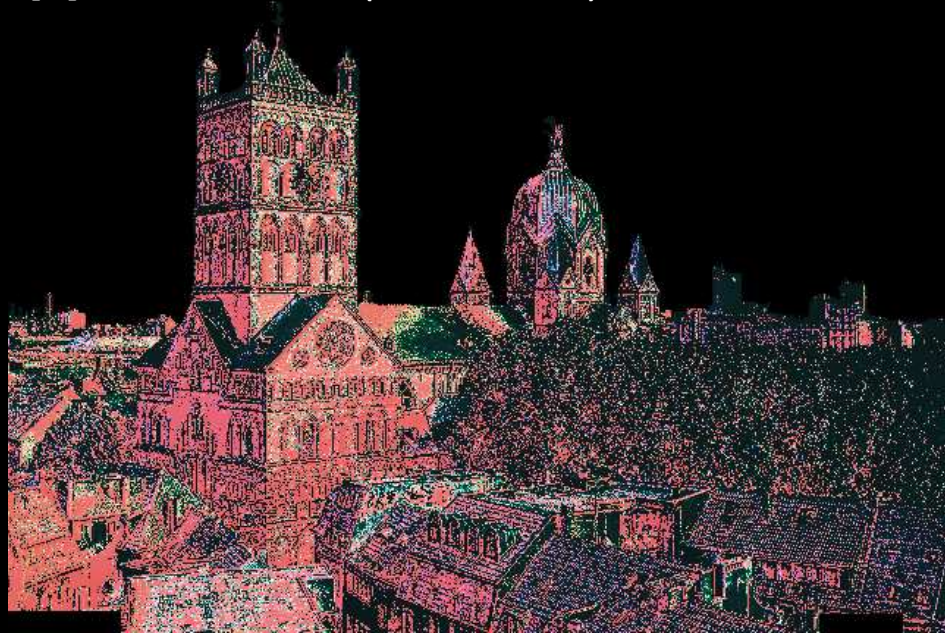



25 images of June 27<sup>th</sup> 2011 (Inverse condition number = 0.223)

Surface normal estimation

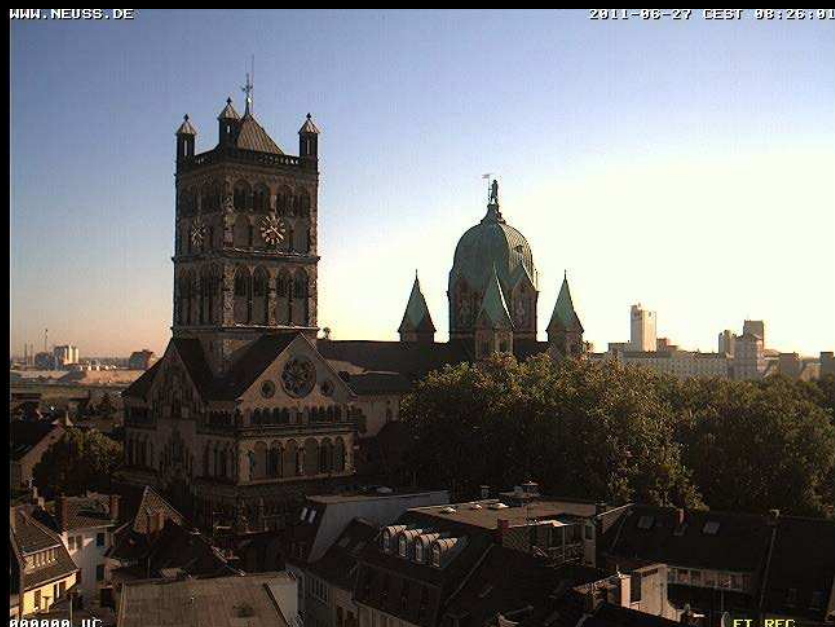

Proposed

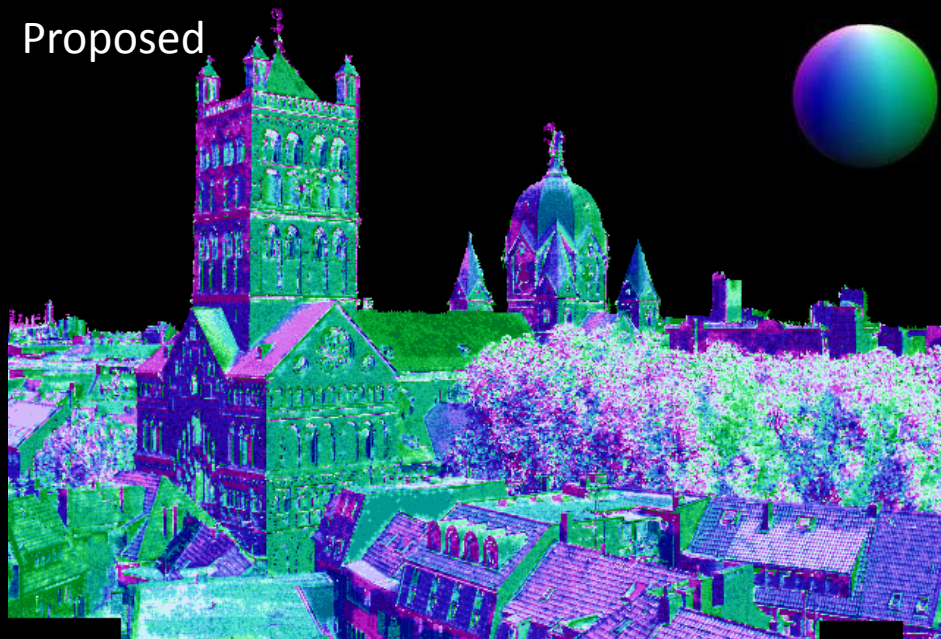

[1] Abrams et al. (ECCV 2012)

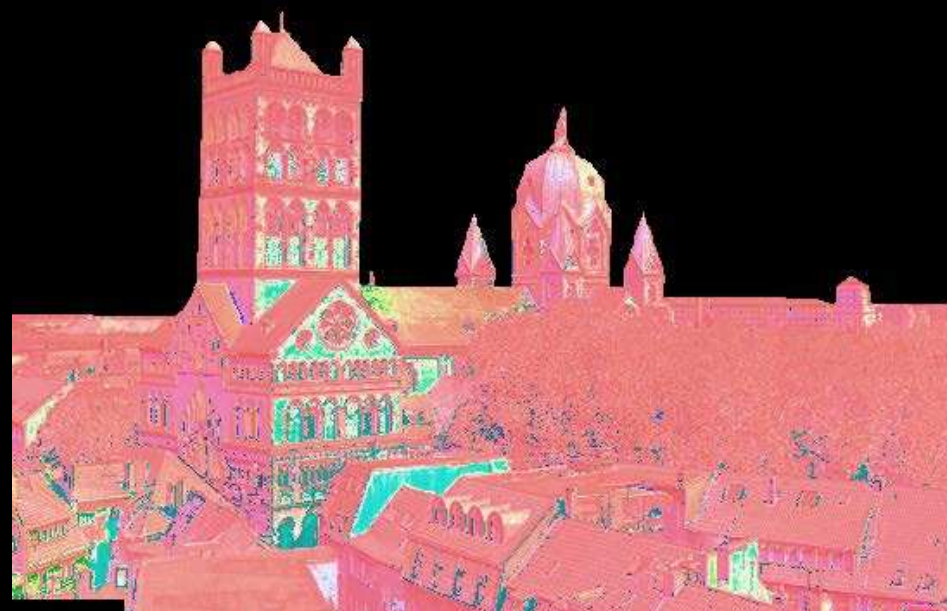

[2] Abrams et al. (CVPR 2013)

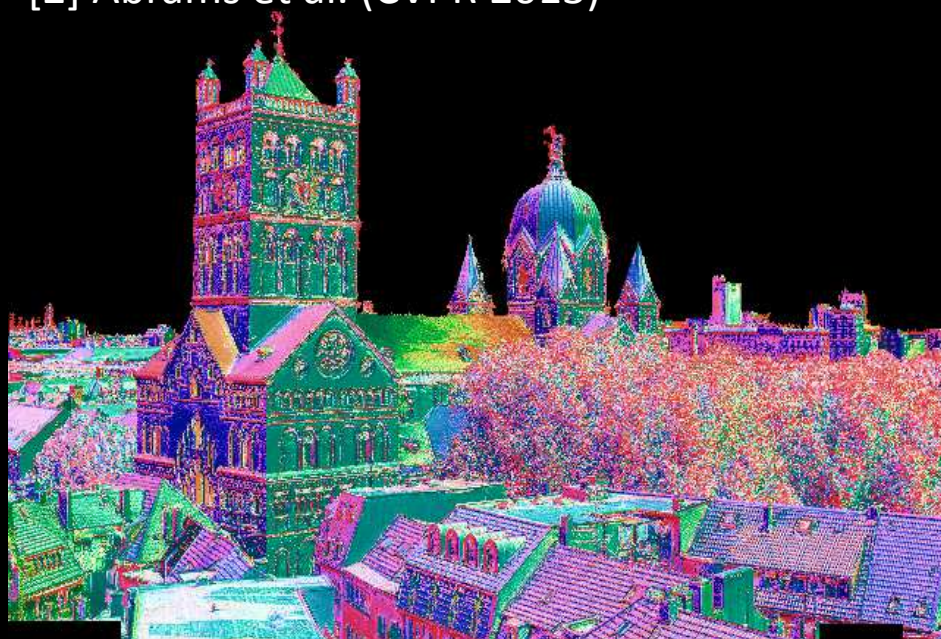



45 images of both days (Inverse condition number = 0.335)

Surface normal estimation

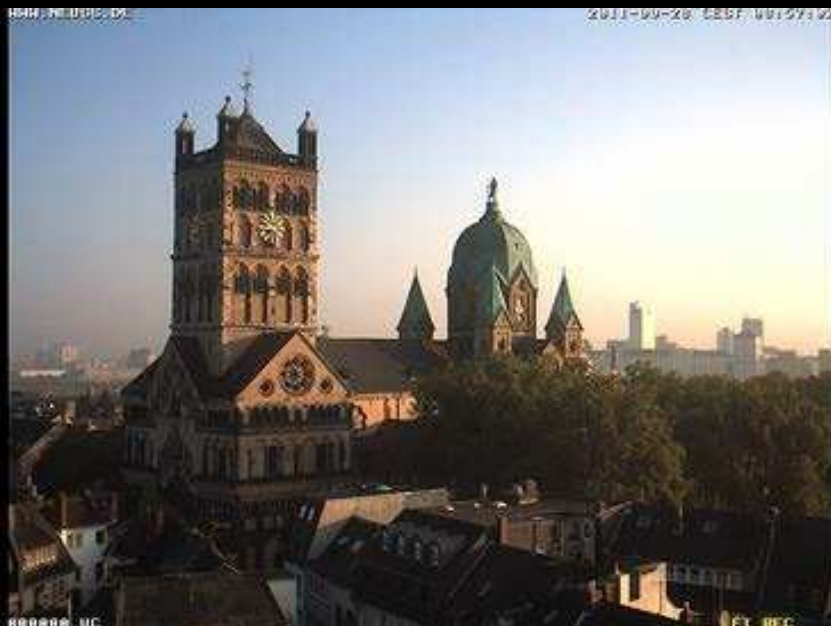

Proposed

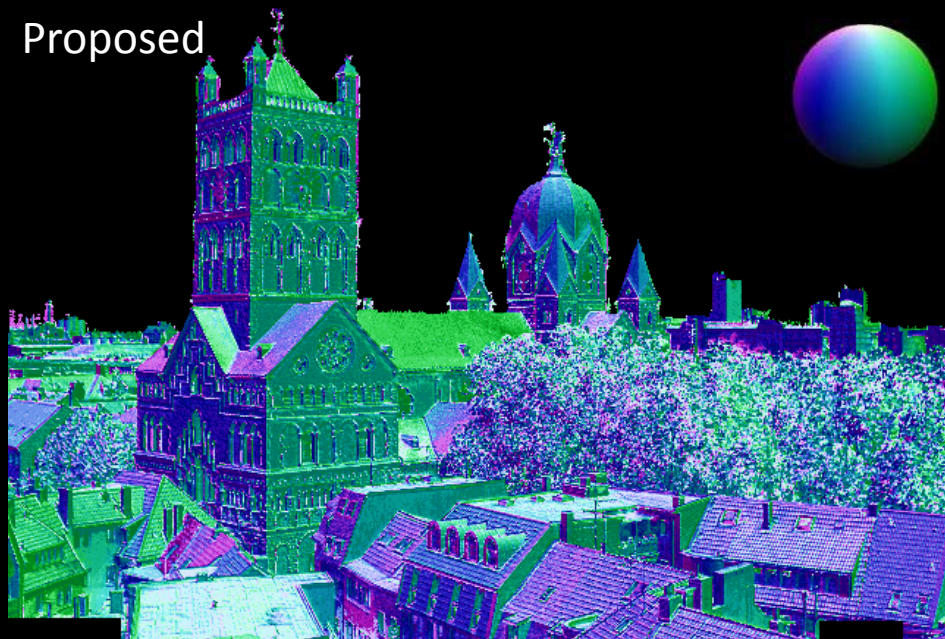

[1] Abrams et al. (ECCV 2012)

[2] Abrams et al. (CVPR 2013)

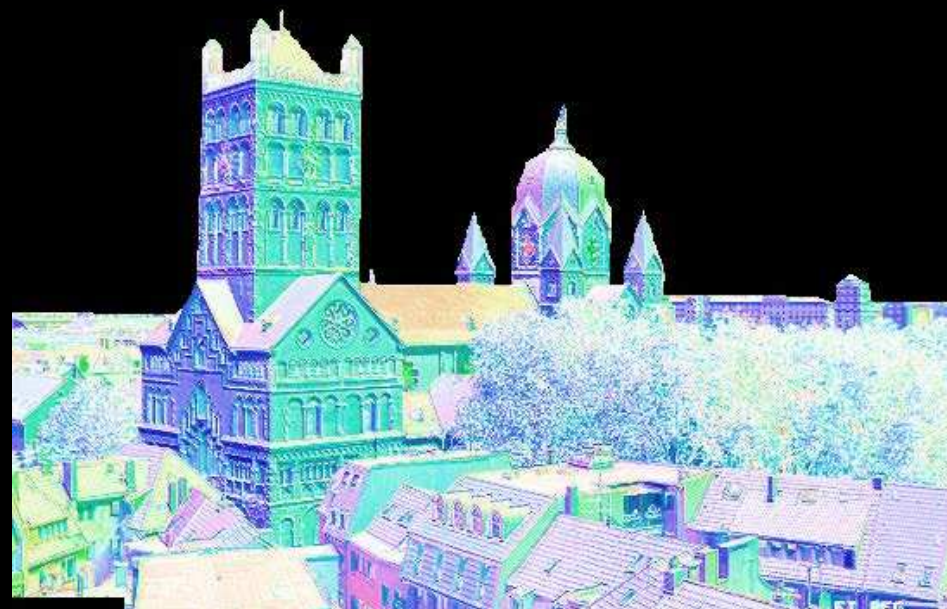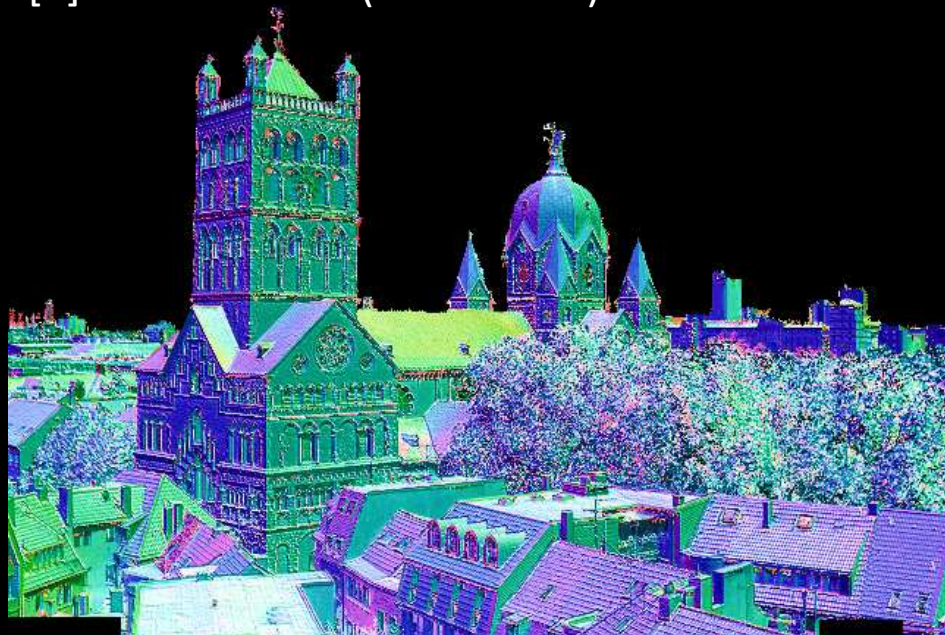



20 images of September 28<sup>th</sup> 2011 (Inverse condition number = 0.013)

Albedo estimation

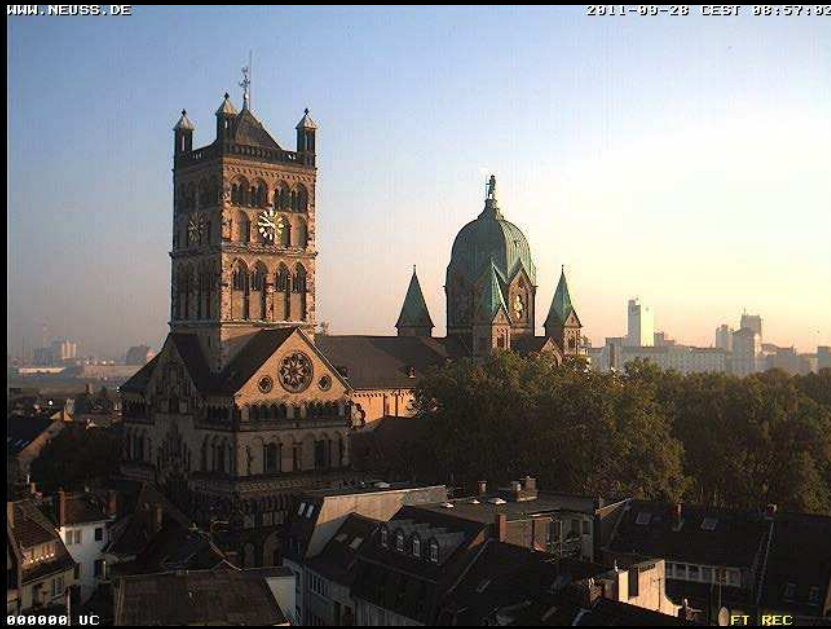

Proposed

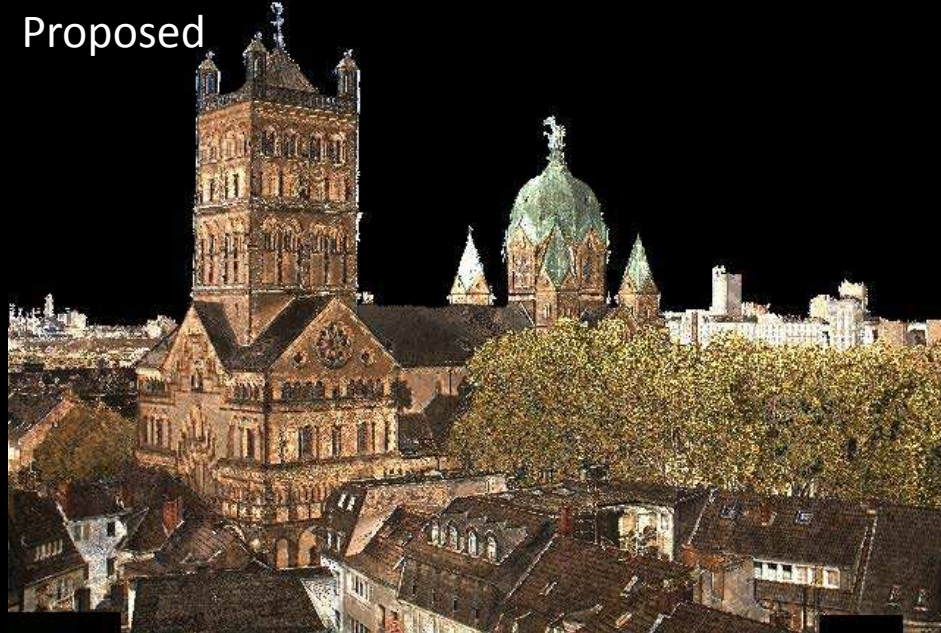

[1] Abrams et al. (ECCV 2012)

[2] Abrams et al. (CVPR 2013)

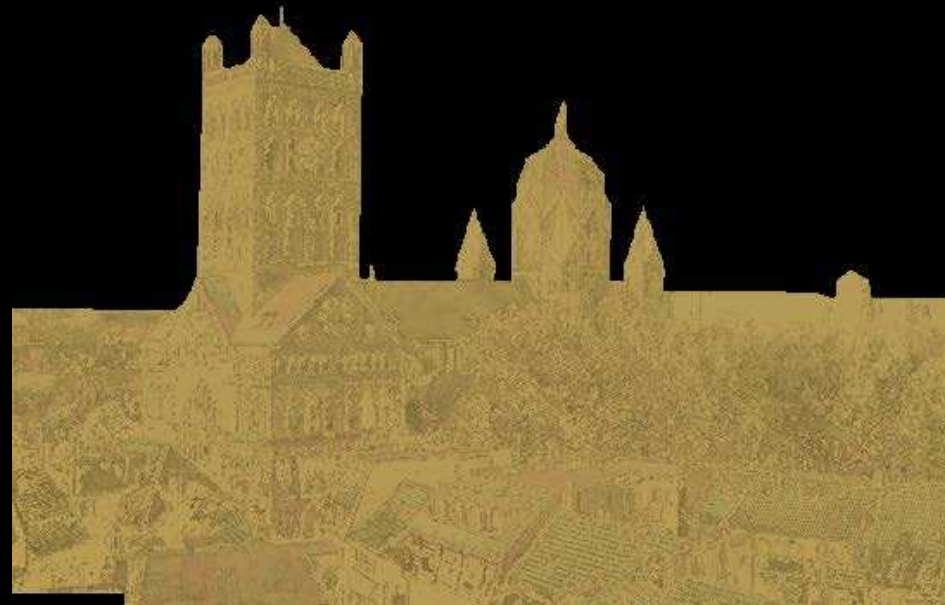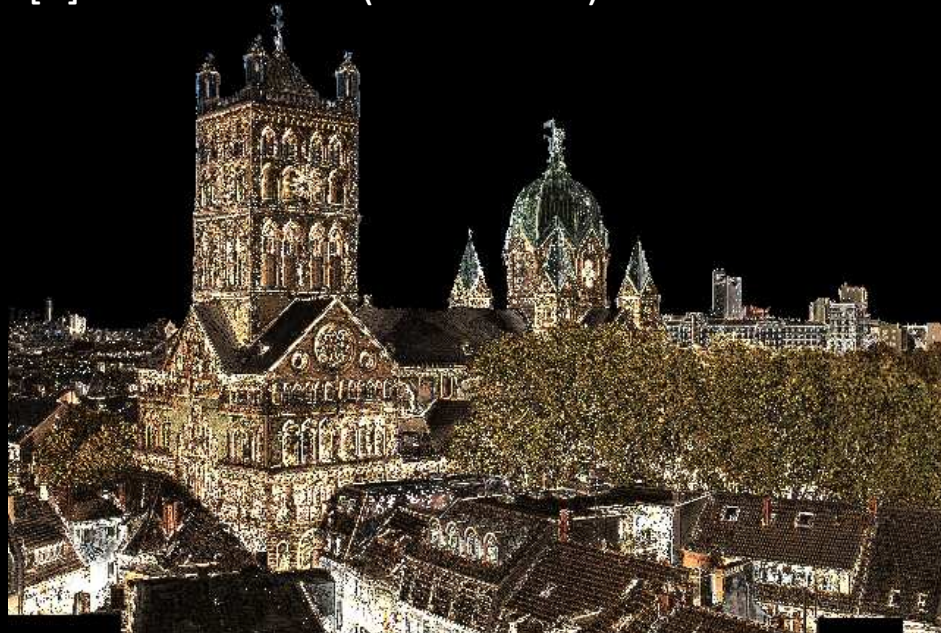



25 images of June 27<sup>th</sup> 2011 (Inverse condition number = 0.223)

Albedo estimation



Proposed

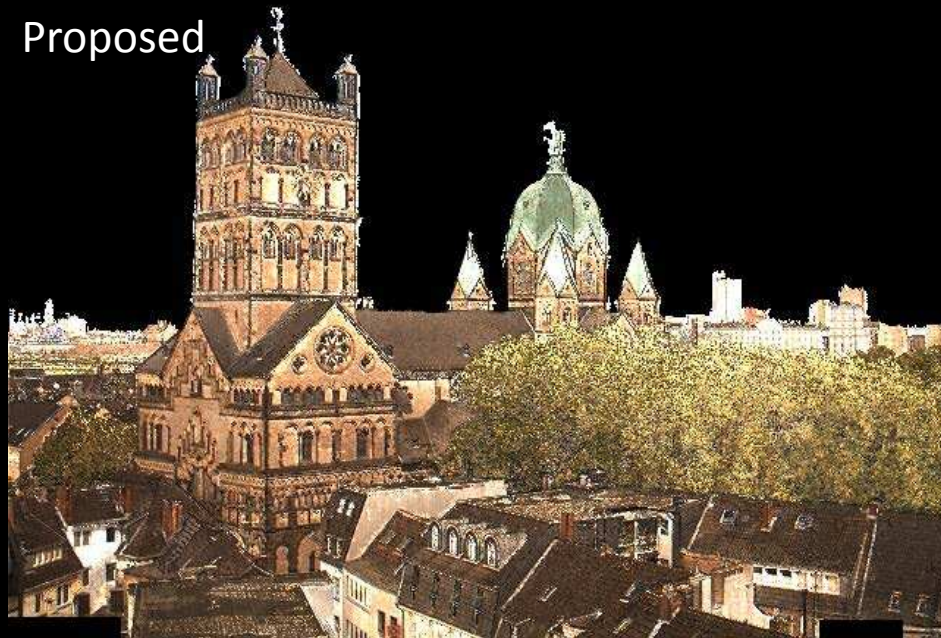

[1] Abrams et al. (ECCV 2012)

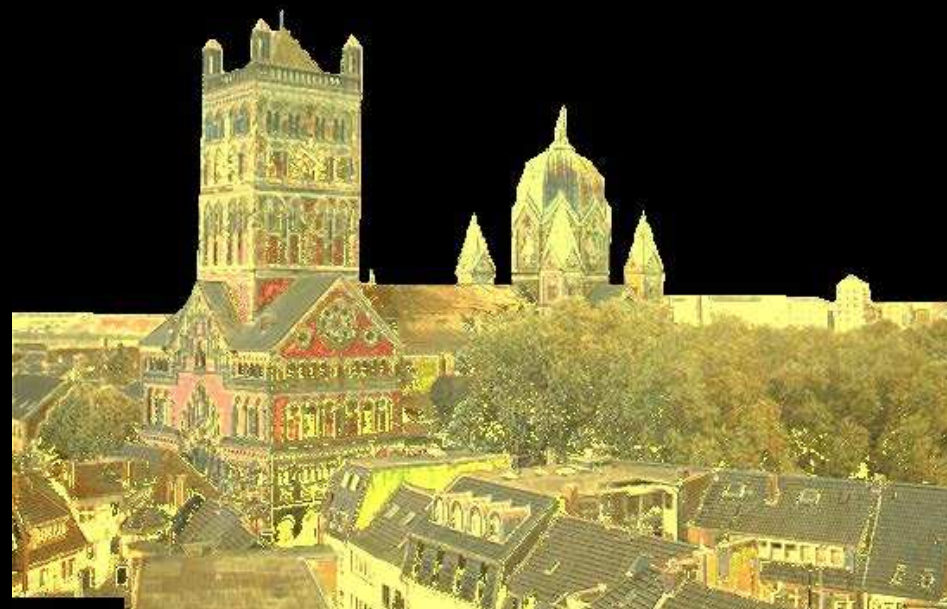

[2] Abrams et al. (CVPR 2013)

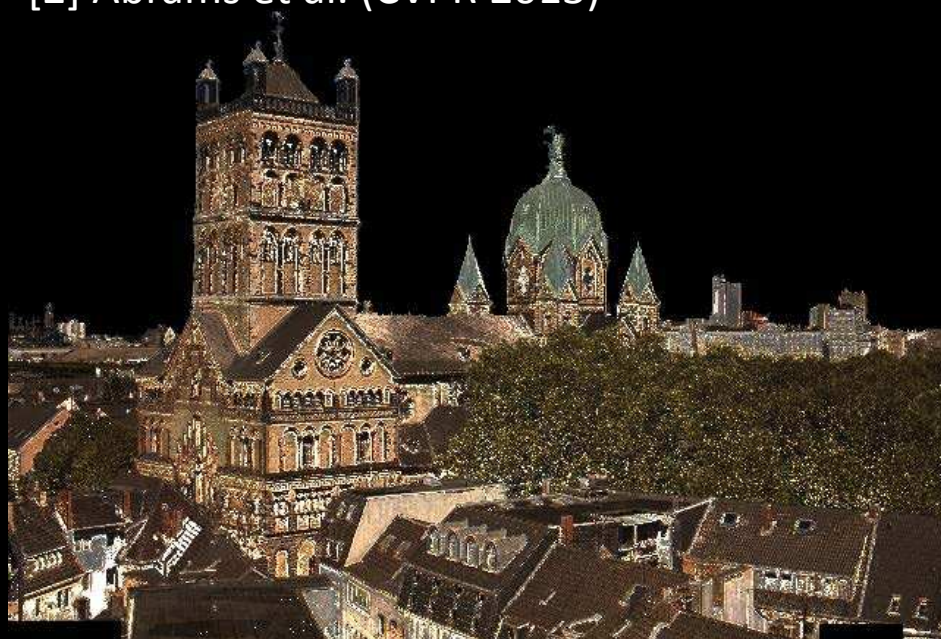



45 images of both days (Inverse condition number = 0.335)

Albedo estimation



Proposed

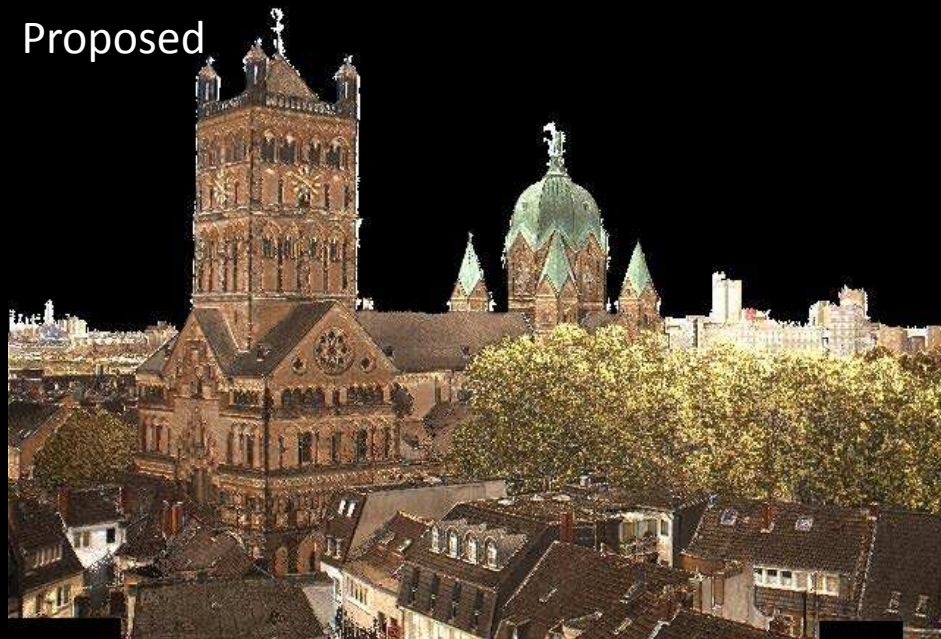

[1] Abrams et al. (ECCV 2012)

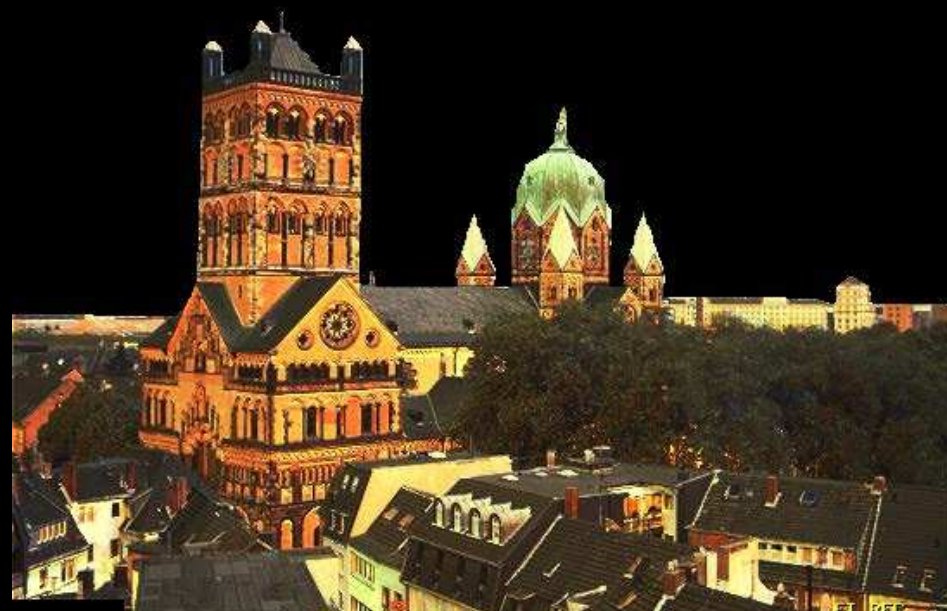

[2] Abrams et al. (CVPR 2013)

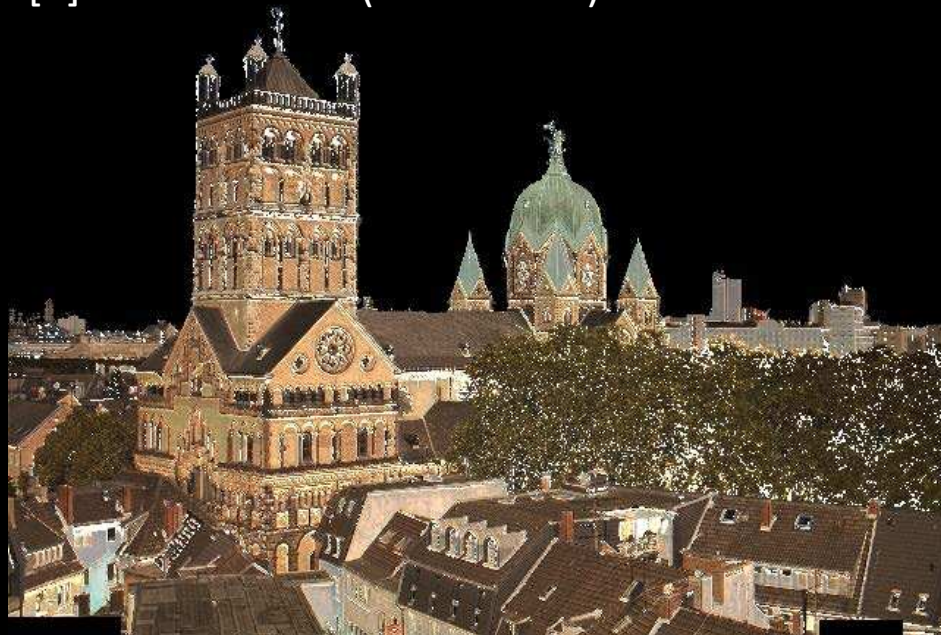



# One-day outdoor photometric stereo via skylight estimation

Jiyoung Jung, Joon-Young Lee, In So Kweon  
Robotics and Computer Vision Lab, KAIST

CVPR 2015



Supplement: Supplementary file 1 [file Jung_One-Day_Outdoor_Photometric_2015_CVPR_supplemental.pdf]
